# Supplementary material for: Circular RNA hsa_circ_0000073 contributes to osteosarcoma cell proliferation, migration, invasion and methotrexate resistance by sponging miR-145-5p and miR-151-3p and upregulating NRAS
Source: Aging (Albany NY). 2020 Jul 24;12(14):14157–73. doi: 10.18632/aging.103423 (PMC7425447; doi:10.18632/aging.103423)
Supplement: Supplementary Figures [file aging-12-103423-s002..pdf]

SUPPLEMENTARY FIGURES

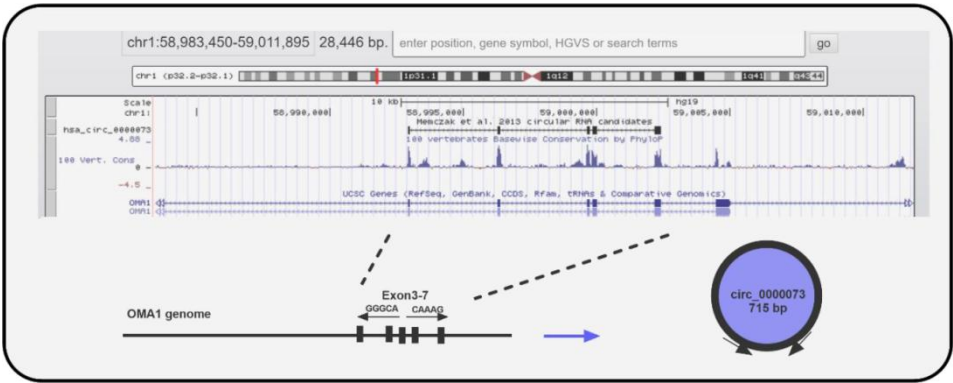

Supplementary Figure 1. The scheme of hsa\_circ\_0000073.

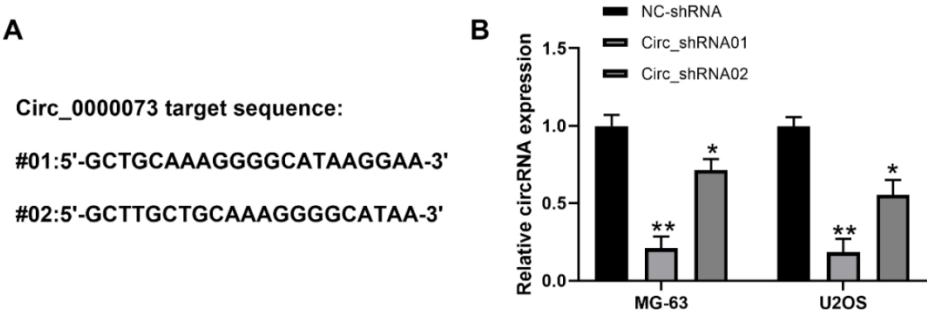

Supplementary Figure 2. (A) Circ\_0000073 target sequence for shRNA design. (B) The silenced efficiencies of circ\_0000073 knock down plasmids were qualified by a qRT-PCR assays, and Circ\_shRNA-01 was selected in the following RNAi experiments.

**A**

|                                                                                                                       |                                                                                                                                                                                                                                                                                 |              |                        |                           |
|-----------------------------------------------------------------------------------------------------------------------|---------------------------------------------------------------------------------------------------------------------------------------------------------------------------------------------------------------------------------------------------------------------------------|--------------|------------------------|---------------------------|
| Transcript id                                                                                                         | Exon information                                                                                                                                                                                                                                                                |              |                        |                           |
| NM_145243                                                                                                             | Spliced_len                                                                                                                                                                                                                                                                     | Exon Number  | Exon Sizes             | Exon Offsets              |
|                                                                                                                       | 715                                                                                                                                                                                                                                                                             | 5            | 75, 129, 108, 174, 229 | 0, 3340, 6692, 6897, 9252 |
| <div>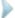 Protein coding potential</div> |                                                                                                                                                                                                                                                                                 |              |                        |                           |
| IRES Elements                                                                                                         | Parameter Index                                                                                                                                                                                                                                                                 |              |                        |                           |
|                                                                                                                       | Position (start-end)                                                                                                                                                                                                                                                            | R Score      | With Pseudoknot (Y/N)  |                           |
|                                                                                                                       | 273-409                                                                                                                                                                                                                                                                         | 1.583801     | Y                      |                           |
|                                                                                                                       | 636-712                                                                                                                                                                                                                                                                         | 1.485804     | Y                      |                           |
| Open Reading Frame<br>(ORF)                                                                                           | Start Position                                                                                                                                                                                                                                                                  | End Position | Protein Length         |                           |
|                                                                                                                       | 233                                                                                                                                                                                                                                                                             | 1+36         | 172 aa                 |                           |
|                                                                                                                       | MEEFKNDMLT EKDARYLAVK EVLCHLIECN KDVPGISQIN WVIHVVDSPi INAFVLPNGQ NFVFTGFLNS VTDIHQLSFL LGHEIAHAVL GHAAEKAGHV HLLDFLGRIF LTHINAICPR DSLALLCQMT QSKLQEVYFN RPYSRKLEAE ADKIGLLAA KGRKEPVAGT 55*<br><br>Note:<br>(1). nr represents n rounds(n<3); (2). * represents a stop codon. |              |                        |                           |
| Protein Features                                                                                                      | The possibility of encoding protein is relatively low(R<1.6 or it has no open reading frame) so no protein features was predicted!                                                                                                                                              |              |                        |                           |

**B**

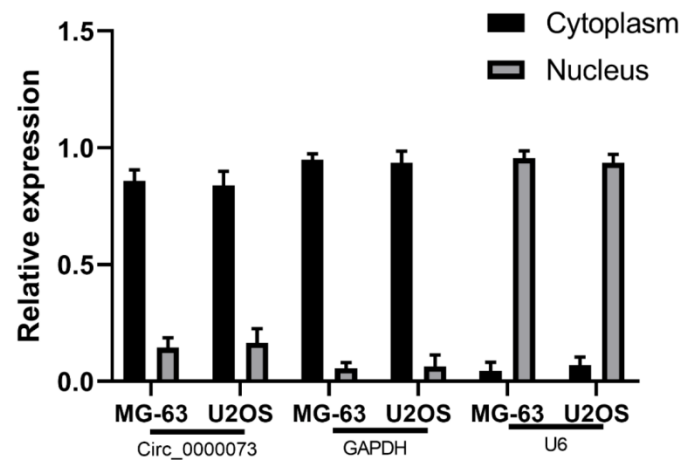

**Supplementary Figure 3.** (A) CircDB database showed that there was no translation function in hsa\_circ\_0000073. (B) The expression of circ\_0000073 in U2OS cells by in-situ hybridization assay.
